# Supplementary material for: Transcriptome analysis reveals the mechanism of pyroptosis-related genes in septic cardiomyopathy
Source: PeerJ. 2023 Oct 19;11:e16214. doi: 10.7717/peerj.16214 (PMC10590578; doi:10.7717/peerj.16214)
Supplement: File S1 [file peerj-11-16214-s001.xls]

## Sheet: Sheet1
Pyroptosis-related genes
AIM2
APIP
CASP1
CASP3
CASP4
CASP5
CASP6
CASP8
CASP9
DHX9
ELANE
GPX4
GSDMA
GSDMA2
GSDMA3
GSDMB
GSDMC
GSDMC2
GSDMC3
GSDMC4
GSDMD
GSDME
GZMA
GZMB
GZMC
GZMD
GZME
GZMF
GZMG
GZMN
IL18
IL1B
IL6
NAIP1
NAIP2
NAIP5
NAIP6
NAIP7
NLRC4
NLRP1
NLRP1B
NLRP2
NLRP3
NLRP6
NLRP7
NLRP9B
NOD1
NOD2
PJVK
PLCG1
PRKACA
PYCARD
SCAF11
TIRAP
TNF
TREM2
ZBP1
BAX
CARD8
CPTP
DDX3X
DDX58
DIABLO
DPP8
DPP9
EEF2K
ELAVL1
FGF21
FOXO3
GBP1
GJA1
HMGB1
IKBKB
MALT1
MAP3K7
MST1
NAIP
NFKB1
NLRP9
P2RX7
PELP1
PLK1
PLAAT4
ROS1
MAPK8
SCGB3A2
STAT1
STK4
TET2
TP53
BAK1
CHMP2A
CHMP2B
CHMP4B
CHMP4C
CHMP6
CHMP7
CYCS
IL1A
IRF1
IRF2
TP63
NLRP1A
ROCK1
SAT1
SATB1
SC5D
SLC20A1
SMAD7
SOD1
SOD2
SPTAN1
SQSTM1
TAP1
TGFB2
TGFBR3
TIMP1
TIMP2
TIMP3
TNF
TNFRSF12A
TNFSF10
