# Supplementary material for: Transcriptome analysis reveals the mechanism of pyroptosis-related genes in septic cardiomyopathy
Source: PeerJ. 2023 Oct 19;11:e16214. doi: 10.7717/peerj.16214 (PMC10590578; doi:10.7717/peerj.16214)
Supplement: File S4 [file peerj-11-16214-s004.xls]

## Sheet: The raw data of RT-qPCR
The raw data of RT-qPCR of H9C2
	β-actin			CASP4			SOD2			IL1B
CON1	15.32	15.58	15.27	23.83	24.19	24.2	22.08	22.29	22.03	31.83	31.9	32.17
CON2	14.75	14.71	14.81	23.58	23.19	23.33	21.33	21.35	21.34	33.91	34.32	34.27
CON3	15.26	15.21	15.2	24.14	24.1	24.12	21.62	21.87	21.55	37.19	36.91	37.37
LPS1	15.8	15.82	15.63	24.26	23.85	24.36	19.39	19.63	19.39	39.36	38.98	N/A
LPS2	15.8	15.9	15.83	24.07	23.9	24	19.65	19.6	19.53	38.62	38.69	N/A
LPS3	15.48	15.32	15.45	23.98	23.73	24.18	19.89	19.44	19.35	38.26	38.71	37.98
	β-actin			NOD1			TP53			GJA1
CON1	16.72	16.57	16.7	38.85	35.67	38.74	22.56	22.82	22.58	22.84	22.74	22.8
CON2	15.2	15.12	15.05	37.16	36.48	37.22	21.06	21.1	21.02	21.84	21.72	21.96
CON3	15.42	15.23	15.31	37	35.48	37.11	20.83	21.02	20.89	21.63	21.79	21.77
LPS1	15.75	15.08	15.48	35.88	37.51	37.07	19.95	19.98	19.93	20.6	20.61	20.79
LPS2	15.83	15.69	15.49	36.92	37.08	37.27	19.96	19.88	19.84	20.42	20.45	20.62
LPS3	15.09	15.04	15.04	35.68	35.29	36.86	20.13	20.25	20.16	21.25	21.21	21.36
	β-actin			SAT1			TAP1			TIMP1			TIMP3
CON1	15.35	15.41	15.25	23.36	22.95	22.63	N/A	N/A	N/A	21.61	21.48	21.47	29.14	28.68	29.19
CON2	15.14	15.18	15.04	22.64	22.26	22.28	N/A	N/A	N/A	20.98	21.01	21.12	28.56	28.4	28.27
CON3	14.78	14.45	14.45	23.33	25.18	24.36	N/A	N/A	N/A	20.25	20.32	20.31	27.37	27.28	27.33
LPS1	14.74	14.56	14.61	20.62	20.42	19.04	37.79	38.86	38.93	19.67	19.73	19.8	26.63	26.58	26.67
LPS2	14.65	14.51	14.59	21.77	22.07	22.56	N/A	N/A	N/A	19.61	19.57	19.68	26.38	26.32	26.23
LPS3	15.74	15.55	15.61	22.49	23.21	23.69	N/A	N/A	N/A	20.22	20.27	20.36	28.13	28.08	28.17
The raw data of RT-qPCR of AC16
	β-actin			SOD2			TIMP1
CON1	13.46	13.6	13.68	21.05	21.22	20.95	18.66	18.41	18.59
CON2	13.52	13.2	13.49	20.74	21.01	20.61	18.32	18	18.28
CON3	13.36	12.98	13.3	20.58	20.77	20.51	18.14	17.78	18.32
LPS1	13.67	13.55	13.6	20.61	20.73	20.62	18.27	18.24	18.45
LPS2	13.47	13.26	13.4	20.43	20.43	20.19	18.4	18.21	18.53
LPS3	13.68	13.22	13.41	20.27	20.45	20.24	17.84	17.74	18.09
	β-actin			IL6			TNFα
NC1	13.94	13.92	13.85	23.05	22.56	22.63	32.62	32.67	32.8
NC2	13.97	13.81	13.87	23.18	23.05	23.14	33.4	32.9	34.26
NC3	13.66	13.69	13.72	22.72	22.53	22.55	33.44	32.8	32.71
NC+LPS1	14.44	14.4	14.36	22.03	21.83	21.35	31.74	32.2	32.24
NC+LPS2	14.5	14.51	14.52	21.86	22	22.08	31.2	32.07	32.14
NC+LPS3	14.1	14.08	14.18	21.18	21.53	21.23	32.23	32.23	31.41
	β-actin			SOD2
NC1	16	16.05	16.24	23.15	22.84	23
NC2	16.1	16.09	15.93	22.71	22.64	22.78
NC3	15.78	15.77	15.73	22.97	22.92	22.82
siRNA1	15.35	15.61	15.36	24.59	24.64	24.73
siRNA2	15.43	15.36	15.34	24.31	24.48	24.28
siRNA3	15.2	15.13	15.29	25.11	24.3	24.39

## Sheet: H9C2 2^-△△CT
		sample	CT-CASP4	CT-β-actin	△CT	△CT-MEAN	─△△CT	2^─△△CT			sample	CT-TP53	CT-β-actin	△CT	△CT-MEAN	─△△CT	2^─△△CT
	control	CON1	24.07	15.39	8.68	8.73	0.05	1.03526		control	CON1	22.79	16.66	6.13	6.42	0.29	1.22264
		CON2	23.37	14.76	8.61		0.12	1.08673			CON2	21.84	15.12	6.72		-0.3	0.812252
		CON3	24.12	15.22	8.9		-0.17	0.888843			CON3	21.73	15.32	6.41		0.01	1.00696
	LPS	LPS1	24.16	15.75	8.41		0.32	1.24833		LPS	LPS1	20.67	15.45	5.22		1.2	2.2974
		LPS2	23.99	15.84	8.15		0.58	1.49485			LPS2	20.5	15.67	4.83		1.59	3.01049
		LPS3	23.96	15.42	8.54		0.19	1.14076			LPS3	21.27	15.06	6.21		0.21	1.15669
		sample	CT-SOD2	CT-β-actin	△CT	△CT-MEAN	─△△CT	2^─△△CT			sample	CT-SAT1	CT-β-actin	△CT	△CT-MEAN	─△△CT	2^─△△CT
	control	CON1	22.13	15.39	6.74	6.59333	-0.146667	0.903335		control	CON1	22.98	15.34	7.64	8.27333	0.633333	1.55114
		CON2	21.34	14.76	6.58		0.013333	1.00928			CON2	22.39	15.12	7.27		1.00333	2.00463
		CON3	21.68	15.22	6.46		0.133333	1.09682			CON3	24.47	14.56	9.91		-1.63667	0.321599
	LPS	LPS1	19.47	15.75	3.72		2.87333	7.32756		LPS	LPS1	20.03	14.64	5.39		2.88333	7.37853
		LPS2	19.59	15.84	3.75		2.84333	7.17676			LPS2	22.13	14.58	7.55		0.723333	1.65099
		LPS3	19.56	15.42	4.14		2.45333	5.4768			LPS3	23.45	15.63	7.82		0.453333	1.3692
		sample	CT-CASP4	CT-β-actin	△CT	△CT-MEAN	─△△CT	2^─△△CT			sample	CT-TIMP1	CT-β-actin	△CT	△CT-MEAN	─△△CT	2^─△△CT
	control	CON1	31.97	15.39	16.58	19.31	2.73	6.63456		control	CON1	21.52	15.34	6.18	5.94	-0.24	0.846745
		CON2	34.17	14.76	19.41		-0.1	0.933033			CON2	21.03	15.12	5.91		0.03	1.02101
		CON3	37.16	15.22	21.94		-2.63	0.161544			CON3	20.29	14.56	5.73		0.21	1.15669
	LPS	LPS1	39.17	15.75	23.42		-4.11	0.0579118		LPS	LPS1	19.73	14.64	5.09		0.85	1.8025
		LPS2	38.66	15.84	22.82		-3.51	0.0877778			LPS2	19.62	14.58	5.04		0.9	1.86607
		LPS3	38.32	15.42	22.9		-3.59	0.0830429			LPS3	20.28	15.63	4.65		1.29	2.44528
		sample	CT-NOD1	CT-β-actin	△CT	△CT-MEAN	─△△CT	2^─△△CT			sample	CT-TIMP3	CT-β-actin	△CT	△CT-MEAN	─△△CT	2^─△△CT
	control	CON1	38.8	16.66	22.14	21.9833	-0.15667	0.897093		control	CON1	29	15.34	13.66	13.2267	-0.43333	0.74055
		CON2	37.19	15.12	22.07		-0.08667	0.941694			CON2	28.41	15.12	13.29		-0.06333	0.957053
		CON3	37.06	15.32	21.74		0.24333	1.18372			CON3	27.29	14.56	12.73		0.49667	1.41095
	LPS	LPS1	37.29	15.45	21.84		0.14333	1.10445		LPS	LPS1	26.63	14.64	11.99		1.23667	2.35654
		LPS2	37.09	15.67	21.42		0.56333	1.47768			LPS2	26.31	14.58	11.73		1.49667	2.82191
		LPS3	35.49	15.06	20.43		1.55333	2.93494			LPS3	28.13	15.63	12.5		0.72667	1.65482
		sample	CT-TP53	CT-β-actin	△CT	△CT-MEAN	─△△CT	2^─△△CT
	control	CON1	22.65	16.66	5.99	5.84	-0.15	0.90125
		CON2	21.06	15.12	5.94		-0.1	0.933033
		CON3	20.91	15.32	5.59		0.25	1.18921
	LPS	LPS1	19.95	15.45	4.5		1.34	2.53151
		LPS2	19.89	15.67	4.22		1.62	3.07375
		LPS3	20.18	15.06	5.12		0.72	1.64718

## Sheet: AC16 2^-△△CT
		sample	CT-SOD2	CT-β-actin	△CT	△CT-MEAN	─△△CT	2^─△△CT			sample	CT-IL6	CT-β-actin	△CT	△CT-MEAN	─△△CT	2^─△△CT
	control	CON1	21.07	13.58	7.49	7.43	-0.06	0.959264		NC	NC1	22.75	13.9	8.85	9	0.15	1.10957
		CON2	20.79	13.4	7.39		0.04	1.02811			NC2	23.12	13.88	9.24		-0.24	0.846745
		CON3	20.62	13.21	7.41		0.02	1.01396			NC3	22.6	13.69	8.91		0.09	1.06437
	LPS	LPS1	20.65	13.61	7.04		0.39	1.31039		NC+LPS	NC+LPS1	21.74	14.4	7.34		1.66	3.16017
		LPS2	20.35	13.38	6.97		0.46	1.37554			NC+LPS2	21.98	14.51	7.47		1.53	2.88786
		LPS3	20.32	13.44	6.88		0.55	1.46409			NC+LPS3	21.33	14.12	7.21		1.79	3.45815
		sample	CT-TIMP1	CT-β-actin	△CT	△CT-MEAN	─△△CT	2^─△△CT			sample	CT-TNFα	CT-β-actin	△CT	△CT-MEAN	─△△CT	2^─△△CT
	control	CON1	18.55	13.58	4.97	4.88	-0.09	0.939523		NC	NC1	32.7	13.9	18.8	19.1333	0.33333	1.25992
		CON2	18.2	13.4	4.8		0.08	1.05702			NC2	33.52	13.88	19.64		-0.50667	0.703845
		CON3	18.08	13.21	4.87		0.01	1.00696			NC3	32.65	13.69	18.96		0.17333	1.12766
	LPS	LPS1	18.32	13.61	4.71		0.17	1.12506		NC+LPS	NC+LPS1	32.06	14.4	17.66		1.47333	2.77662
		LPS2	18.38	13.38	5		-0.12	0.920188			NC+LPS2	32.11	14.51	17.6		1.53333	2.89453
		LPS3	17.89	13.44	4.45		0.43	1.34723			NC+LPS3	32.23	14.12	18.11		1.02333	2.03261
											sample	CT-SOD2	CT-β-actin	△CT	△CT-MEAN	─△△CT	2^─△△CT
										NC	NC1	23	16.1	6.9	6.90333	0.003333	1.00231
											NC2	22.71	16.04	6.67		0.233333	1.17555
											NC3	22.9	15.76	7.14		-0.236667	0.848704
										siRNA	siRNA1	24.65	15.44	9.21		-2.30667	0.202127
											siRNA2	24.36	15.38	8.98		-2.07667	0.237061
											siRNA3	24.35	15.21	9.14		-2.23667	0.212176
